# Supplementary material
Source: publisher site journal article supplement (https://www.dovepress.com/article/443774)
Supplement: Supplementary file 1 [file get_supplementary_file.php]

**Supplementary material**

***Table S1.*** *Treatment and outcome of 32 severe HLH patients*

| **Number** | **Gender** | **Age** | **Triggers** | **Multiple organ/system damage** | **Treatment** | **OS (days)** | **Outcome** |
| --- | --- | --- | --- | --- | --- | --- | --- |
| 1 | Female | 77 | Infection (Bacteria) | Respiratory failure，liver failure，renal failure | Symptomatic treatment | 4 | Dead |
| 2 | Male | 79 | Infection (Bacteria) | Respiratory failure，septic shock，severe pneumonia，DIC | Symptomatic treatment | 5 | Dead |
| 3 | Female | 19 | Infection (Bacteria) | Respiratory failure，Septic shock，severe pneumonia，DIC | Symptomatic treatment | 12 | Dead |
| 4 | Male | 45 | Infection (EBV) | Liver failure，renal failure，septic shock，DIC | Symptomatic treatment | 13 | Dead |
| 5 | Male | 58 | Infection (Fungal) | Respiratory failure，liver failure，Septic shock，severe pneumonia，DIC | Symptomatic treatment | 10 | Dead |
| 6 | Female | 66 | Infection (Respiratory syncytial virus ) | Respiratory failure，renal failure，septic shock，DIC | Symptomatic treatment | 6 | Dead |
| 7 | Female | 39 | Infection (EBV) | Respiratory failure，septic shock，DIC | Corticosteroids | 17 | Dead |
| 8 | Male | 28 | Infection (Bacteria) | Respiratory failure，renal failure，DIC | Corticosteroids and etoposide | 5 | Dead |
| 9 | Male | 43 | T-cell lymphoma | Respiratory failure，septic shock，severe pneumonia，heart failure | Corticosteroids | 3 | Dead |
| 10 | Male | 58 | Unknown reason | Respiratory failure，renal failure，septic shock，DIC | Corticosteroids | 1 | Dead |
| 11 | Female | 71 | Unknown reason | Liver failure，septic shock，DIC | Symptomatic treatment | 5 | Dead |
| 12 | Male | 64 | Infection (Bacteria) | Renal failure，septic shock，severe pneumonia，DIC | Symptomatic treatment | 26 | Dead |
| 13 | Female | 57 | Infection (Bacteria) | Respiratory failure，renal failure，liver failure ，DIC | Corticosteroids | 3 | Dead |
| 14 | Female | 47 | Autoimmune | Respiratory failure，renal failure，septic shock | Corticosteroids | 4 | Dead |
| 15 | Male | 64 | Unknown reason | Respiratory failure，severe pneumonia | Etoposide, corticosteroids and immunoglobulin | 50 | Dead |
| 16 | Female | 79岁 | Infection (Bacteria) | Septic shock，renal failure | Symptomatic treatment | 24 | Dead |
| 17 | Female | 74 | Infection (Fungal) | Respiratory failure，septic shock，heart failure | Symptomatic treatment | 4 | Dead |
| 18 | Female | 41 | Autoimmune | Severe pneumonia，heart failure | Corticosteroids and cyclophosphamide | 16 | Dead |
| 19 | Female | 46 | Infection (EBV) | Severe pneumonia | Symptomatic treatment | 7 | Dead |
| 20 | Female | 47 | Infection (Bacteria) | Respiratory failure，liver failure，renal failure，septic shock，DIC | Symptomatic treatment | 5 | Dead |
| 21 | Male | 42 | Infection (Bacteria) | Liver failure | Corticosteroids | 17 | Dead |
| 22 | Male | 13 | Unknown reason | Liver failure，renal failure，DIC | Etoposide，Hormone | 4 | Dead |
| 23 | Female | 67 | Infection (EBV) | Respiratory failure, heart failure | Symptomatic treatment | 2 | Dead |
| 24 | Female | 35 | Large B-cell lymphoma | Septic shock，respiratory failure，heart failure | Corticosteroids | 9 | Dead |
| 25 | Female | 43 | Unknown reason | Respiratory failure | Corticosteroids | 6 | Dead |
| 26 | Male | 19 | Unknown reason | Respiratory failure，liver failure，septic shock | Corticosteroids and liposomal doxorubicin | 8 | Dead |
| 27 | Male | 33 | Infection (Bacteria) | DIC | Corticosteroids and liposomal doxorubicin | 6 | Dead |
| 28 | Male | 57 | Infection (EBV) | Respiratory failure，liver failure，septic shock | Corticosteroids | 6 | Dead |
| 29 | Female | 86 | Lymphoma | Respiratory failure，septic shock, severe pneumonia | Corticosteroids | 13 | Dead |
| 30 | Male | 66 | Infection (Bacteria) | Respiratory failure，septic shock | Symptomatic treatment | 30 | Dead |
| 31 | Male | 53 | B-cell lymphoma | Respiratory failure，septic shock | Symptomatic treatment | 27 | Dead |
| 32 | Male | 50 | NK/T cell lymphoma | Respiratory failure，liver failure，heart failure, septic shock, renal failure, DIC | Symptomatic treatment | 7 | Dead |
